# Supplementary material for: The reconstruction of equivalent underlying model based on direct causality for multivariate time series
Source: PeerJ journal article supplement (doi:10.7717/peerj-cs.1922), 2024-03-18
Supplement: supplemental_files.docx [file supplemental_files.docx]

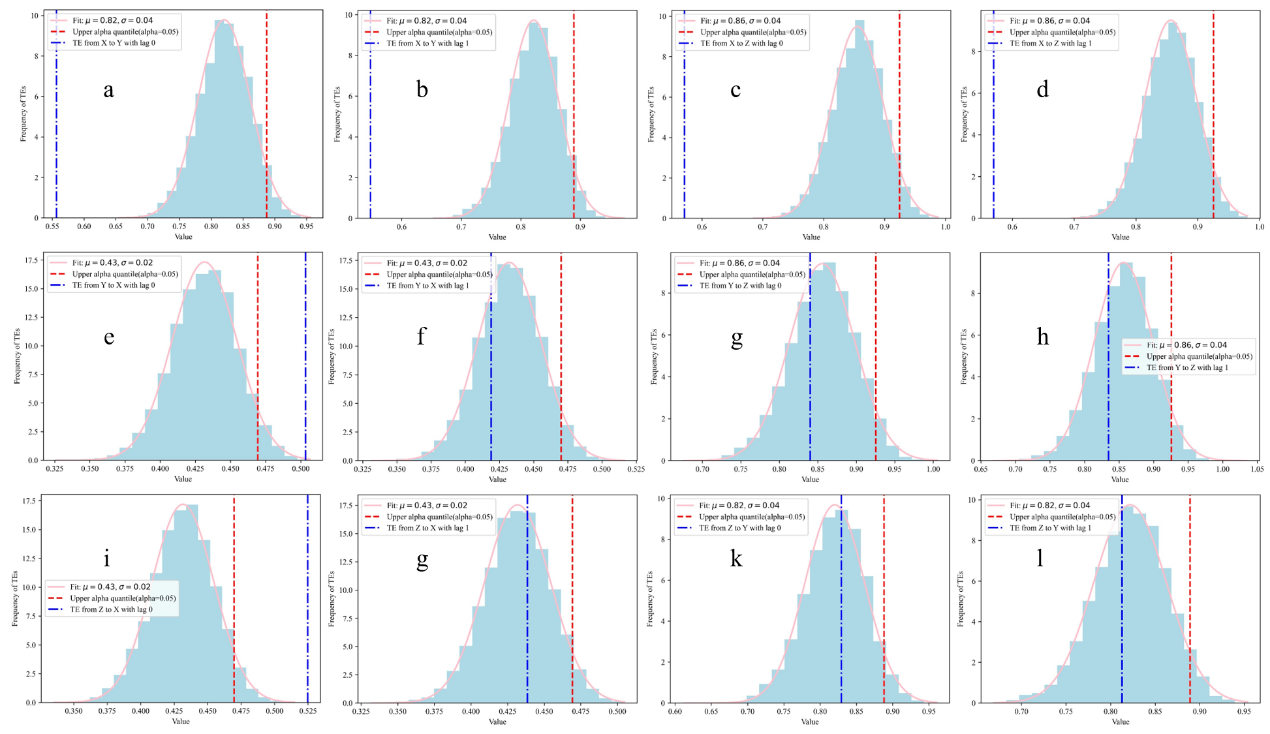


**Figure S1.** TEs from White Gaussian Noise to a specific variable with lag, derived from *N*-trial Monte Carlo simulations, in Case 1. a: →*Y*(*t*) , b: →*Y*(*t*), c: →*Z*(*t*), d: →*Z*(*t*), e: →*X*(*t*), f: →*X*(*t*) , g: →*Z*(*t*). h: →*Z*(*t*), I: →*X*(*t*) , j: →*X*(*t*) , k: →*Y*(*t*), l: →*Y*(*t*).


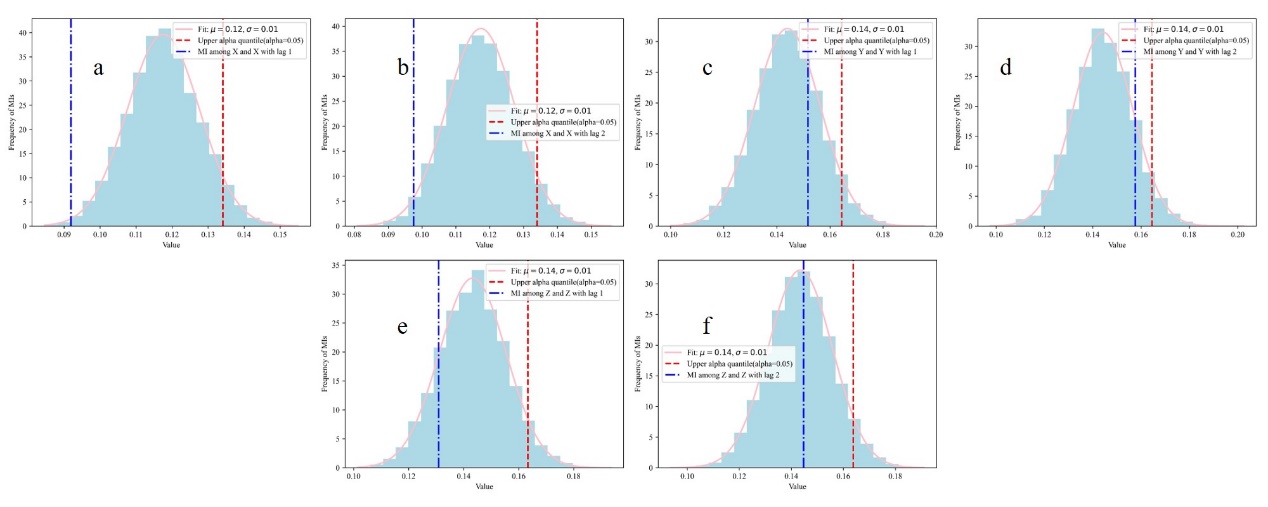


**Figure S2.** MIs between White Gaussian Noise and a specific variable with lag, derived from *N*-trial Monte Carlo simulations, in Case 1. a: *I*(*X*(*t*);*X*(*t* −1)) , b: *I*(*X*(*t*);*X*(*t* −2)), c: *I*(*Y*(*t*);*Y*(*t* −1)), d: *I*(*Y*(*t*);*Y*(*t* −2)), e: *I*(*Z*(*t*);*Z*(*t* −1)), f, *I*(*Z*(*t*);*Z*(*t* −2)).


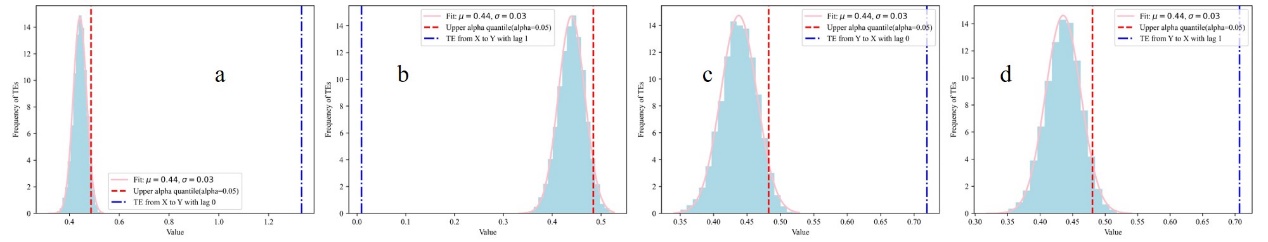


**Figure S3.** TEs from White Gaussian Noise to a specific variable with lag, derived from *N*-trial Monte Carlo simulations, in Case 2. a: →*Y*(*t*) , b: →*Y*(*t*), c: →*X*(*t*), d: →*X*(*t*).


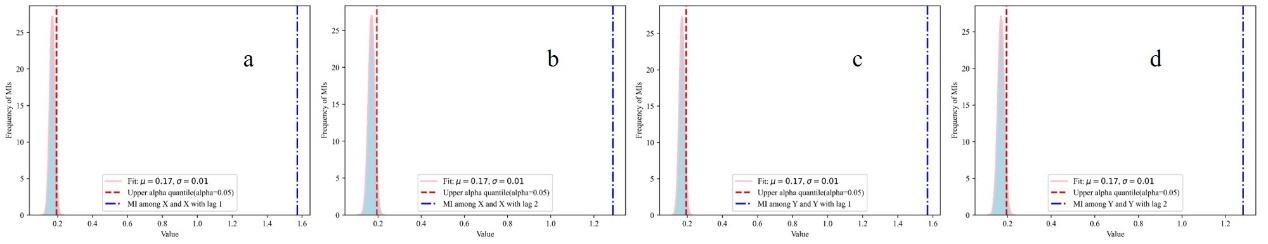


**Figure S4.** MIs between White Gaussian Noise and a specific variable with lag, derived from *N*-trial Monte Carlo simulations, in Case 2. a: *I*(*X*(*t*);*X*(*t* −1)) , b: *I*(*X*(*t*);*X*(*t* −2)), c: *I*(*Y*(*t*);*Y*(*t* −1)), d: *I*(*Y*(*t*);*Y*(*t* −2)).


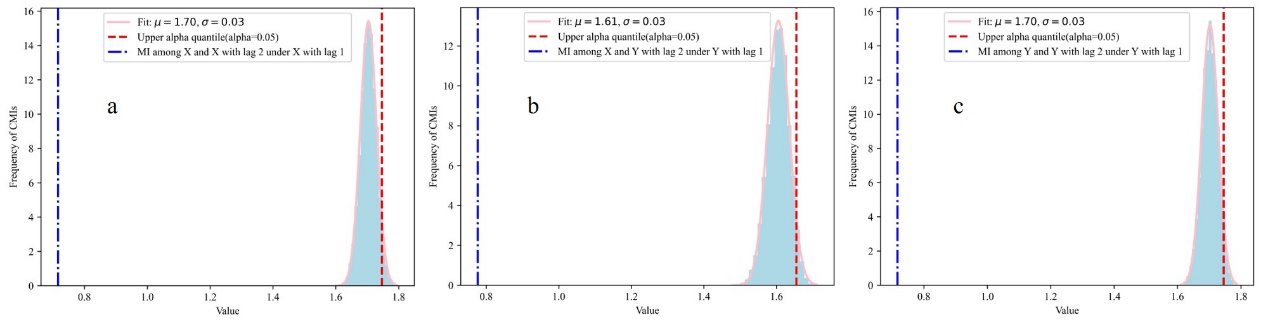


**Figure S5.** CMIs between two specific variables with lag when conditioned on White Gaussian Noise, derived from *N*-trial Monte Carlo simulations, in Case 2. a: *I*(*X*(*t*);*X*(*t* −2)|*X*(*t* −1)), b: *I*(*X*(*t*);*Y*(*t* −2)|*Y*(*t* −1)), c: *I*(*Y*(*t*);*Y*(*t* −2)|*Y*(*t* −1)).
